# Supplementary material for: Microbial Organic Matter Degradation Potential in Baltic Sea Sediments Is Influenced by Depositional Conditions and In Situ Geochemistry
Source: PubMed Central journal article supplement (PMC6365825; doi:10.1128/aem.02164-18), 2019-02-06
Supplement: d2bfe4c05401469e11a6ff06ed5920df_AEM.02164-18-s0001.pdf [file d2bfe4c05401469e11a6ff06ed5920df_AEM.02164-18-s0001.pdf]

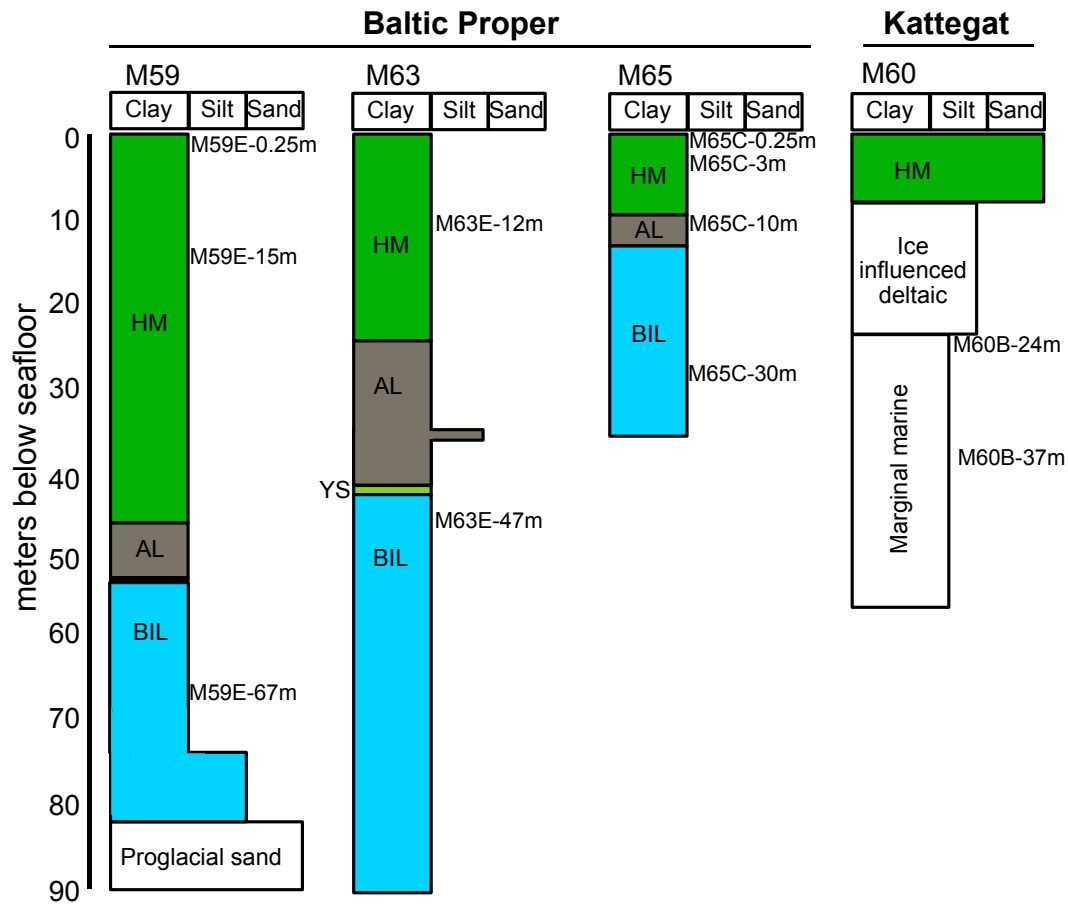

**Supplemental Figure 1.** Schematic of sediment core profiles and characteristics. Samples are labeled to the right of the sediment column. HM: Holocene Mud (which represents both the Littorina Sea and modern Baltic Sea); AL: Ancylus Lake; YS: Yoldia Sea; BIL: Baltic Ice Lake.

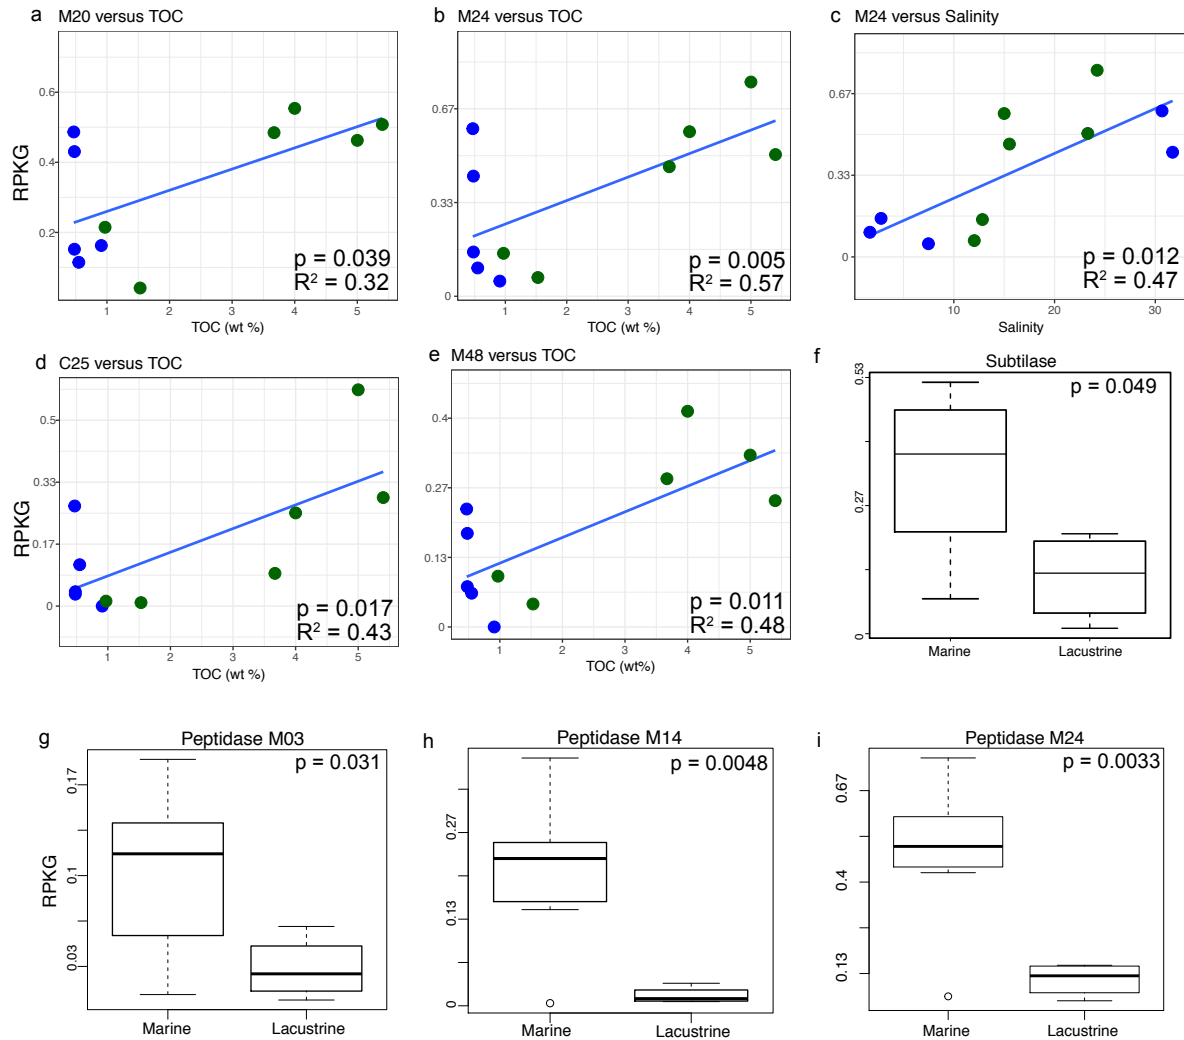

**Supplemental Figure 2.** Linear models (a-e) or boxplots (f-i) of abundant ORFs putatively encoding extracellular peptidases compared to select environmental parameters. Blue dots represent samples deposited during the late Pleistocene and are most glacially influenced, green samples were deposited during the Holocene (i.e. the Ancylus Lake, Littorina Sea, and Baltic Sea phases of the Baltic's history). P-values for boxplots are based on t-tests.

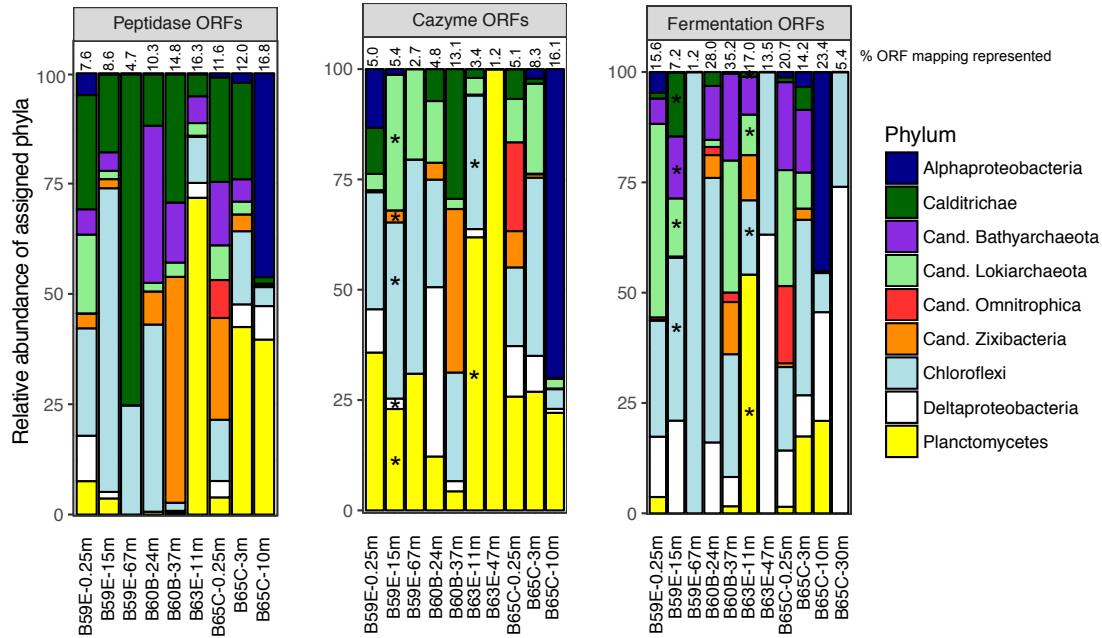

**Supplemental Figure 3.** Taxonomic assignments at the phylum level of ORFs putatively encoding CAZymes, peptidases, or fermentation proteins. Relative abundance on the y-axis represents the coverage of contigs assigned to each phylum relative to the coverage of ORFs which were assigned taxonomy at the phylum level by the least common ancestor algorithm in MEGAN. These relative abundances only include abundances of ORFs which were assigned within a phylum, and the percent of coverage for represented for that ORF category is shown along the top of the bars. Only samples with mapped ORFs assigned within a phylum were graphed here. Asterisks represent phyla with mapped metatranscriptomic reads.

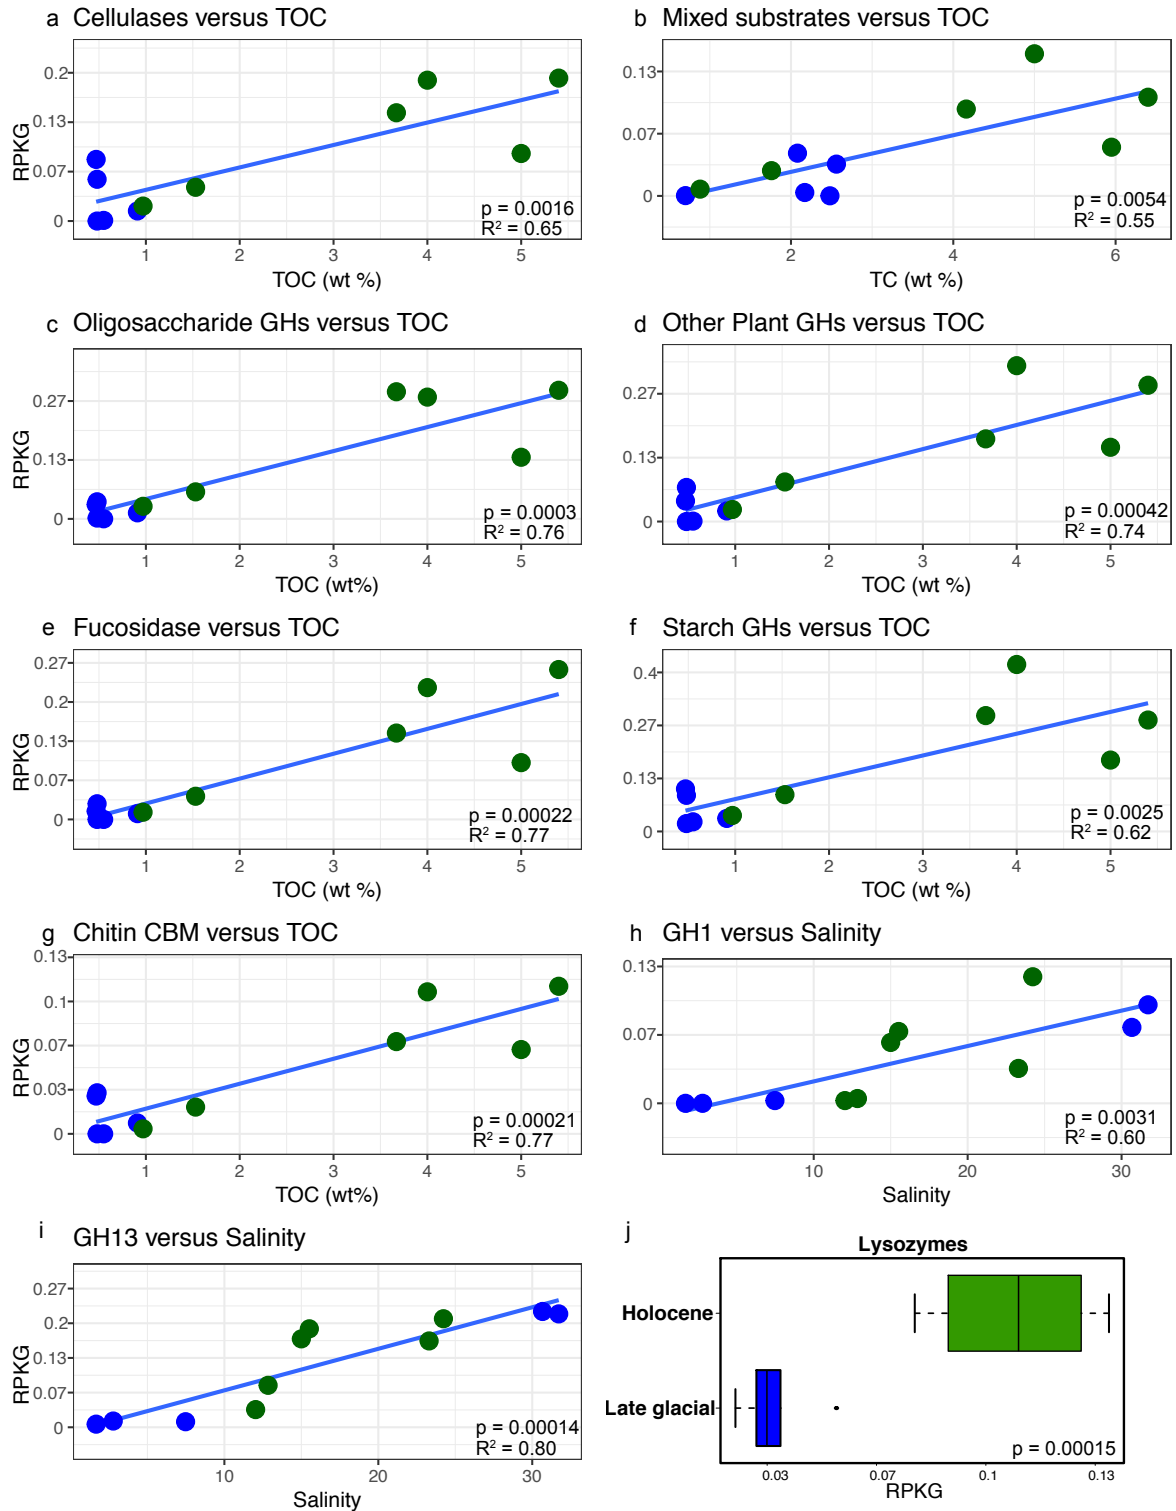

**Supplemental Figure 4.** Linear models (a-i) or boxplots (j) of abundant ORFs putatively encoding extracellular CAZyme groups compared to select environmental parameters. Blue dots

represent samples deposited during the late Pleistocene and are most glacially influenced, green samples were deposited during the Holocene (i.e. the Ancylus Lake, Littorina Sea, and modern Baltic Sea phases of the Baltic's history). P-values for boxplots are based on t-tests.

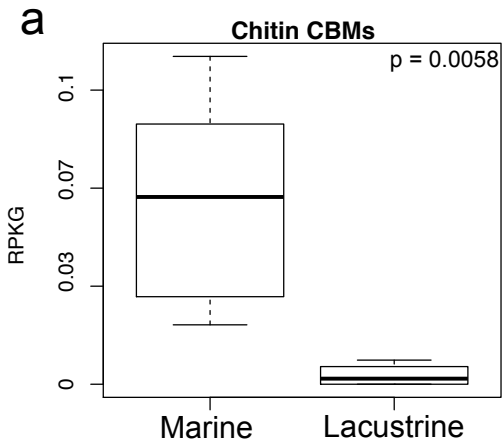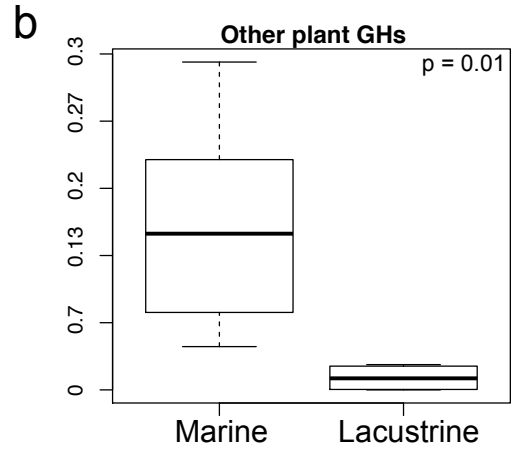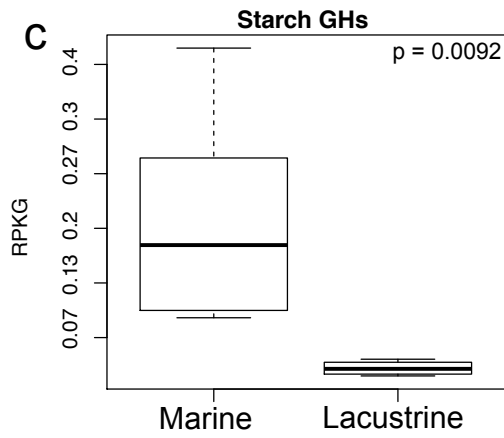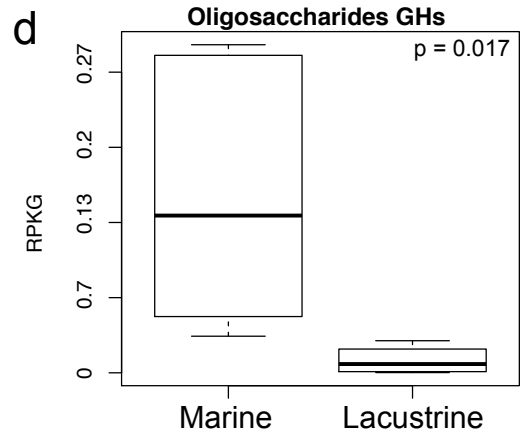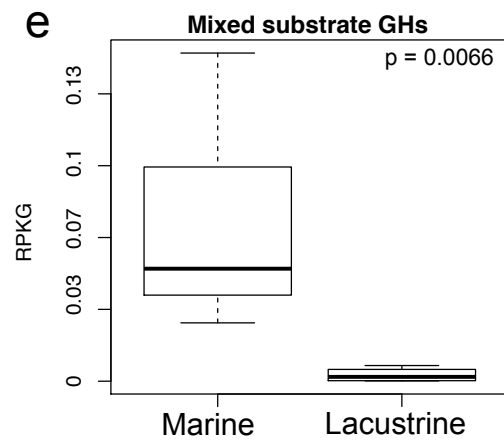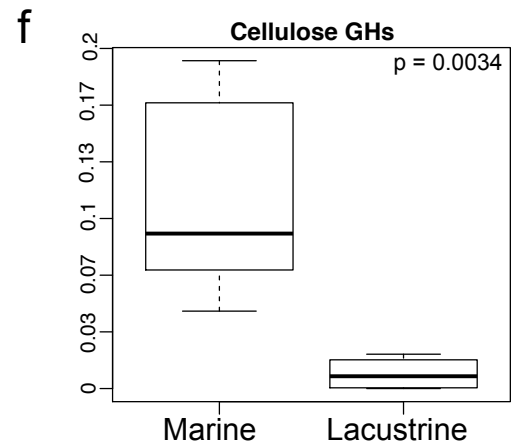

**Supplemental Figure 5.** Boxplots showing abundances of ORFs putatively encoding extracellular CAZyme groups by marine versus lacustrine depositional conditions. P-values based on t-tests are shown in the upper right corner of each boxplot.

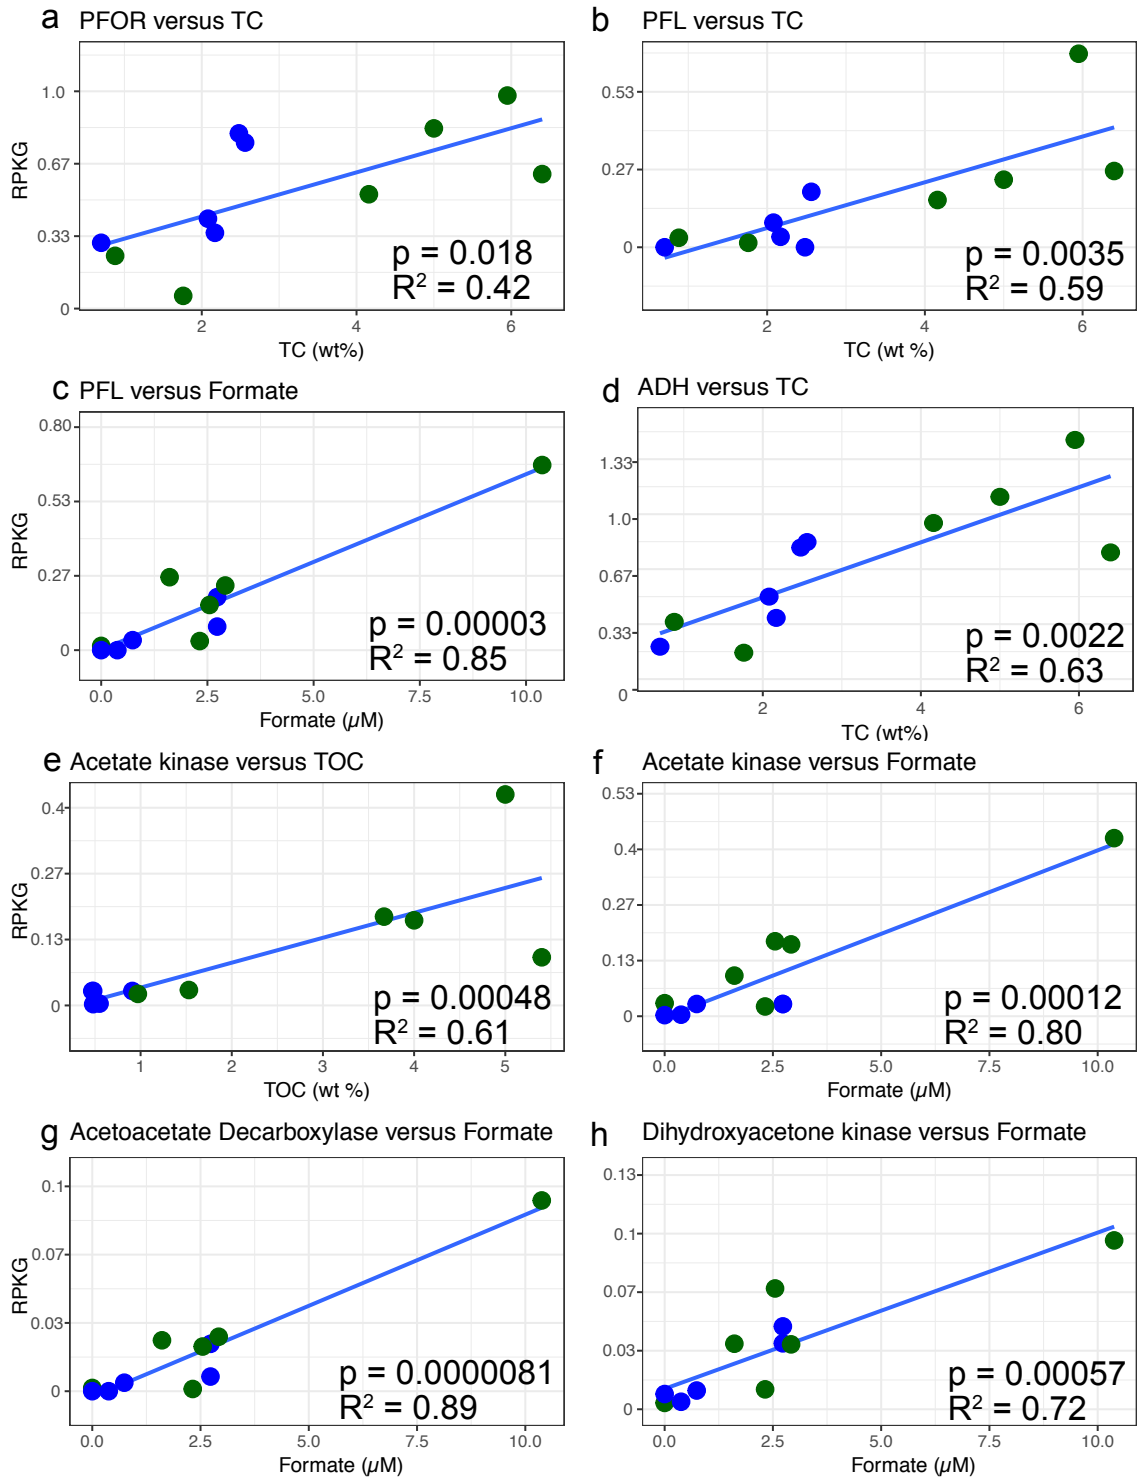

**Supplemental Figure 6.** Linear models of ORFs putatively encoding fermentation mediating enzymes compared to select environmental parameters. Blue dots represent samples deposited



during the late Pleistocene and are most glacially influenced, green samples were deposited during the Holocene (i.e. the Ancylus Lake, Littorina Sea, and Baltic Sea phases of the Baltic's history).

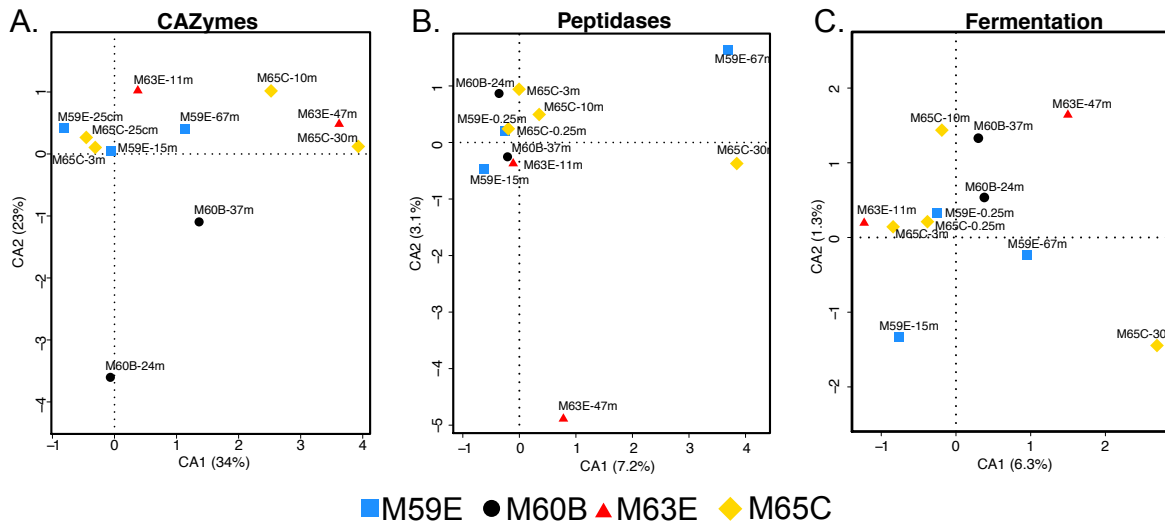

**Supplemental Figure 7.** Canonical Correspondence Analyses of abundances of ORFs putatively encoding the following groups of enzymes: a) carbohydrate active enzymes; b) peptidases; and c) fermentation mediation proteins.

**Supplemental table 1.** Sequencing and processing statistics.

|                 | <b>Data Source</b>         | <b>Sampling campaign</b>              | <b>Site</b>                 | <b>Sample</b>         | <b>Depth (m)</b>  | <b>Raw reads</b>      | <b>Post-QC reads</b>  | <b>Post-dereplication reads</b> | <b>Percent reads mapping to assembly</b> |
|-----------------|----------------------------|---------------------------------------|-----------------------------|-----------------------|-------------------|-----------------------|-----------------------|---------------------------------|------------------------------------------|
| DNA             | This paper                 | Skagge-<br>rak-<br>Kattegat<br>Seabed | M59                         | SMT                   | 0.25              | 49,239,081            | 46,783,878            | 46,058,076                      | 26.41%                                   |
|                 | This paper                 | IODP x347                             |                             | 5H2                   | 15                | 29,293,749            | 28,328,313            | 26,195,655                      | 35.95%                                   |
|                 | Marshall et al.            | IODP x347                             |                             | 21H2                  | 67                | 70,856,845            | 30,948,382            | 1,072,012                       | 27.77%                                   |
|                 | Marshall et al.            | IODP x347                             | M60                         | 9H2                   | 24                | 40,486,926            | 32,499,543            | 2,018,541                       | 32.63%                                   |
|                 | Marshall et al.            | IODP x347                             |                             | 13H2                  | 37                | 54,835,820            | 41,888,865            | 4,363,223                       | 32.98%                                   |
|                 | Marshall et al.            | IODP x347                             | M63                         | 6H2                   | 12                | 38,620,470            | 25,846,898            | 4,309,404                       | 24.27%                                   |
|                 | Marshall et al.            | IODP x347                             |                             | 24H2                  | 47                | 49,069,002            | 37,775,844            | 2,211,025                       | 22.53%                                   |
|                 | This paper                 | Bornholm Basin                        | M65                         | SMT                   | 0.25              | 42,069,302            | 39,698,484            | 39,156,112                      | 24.96%                                   |
|                 | This paper                 | IODP x347                             |                             | 2H2                   | 3                 | 49,584,551            | 45,176,765            | 10,852,368                      | 28.39%                                   |
|                 | This paper                 | IODP x347                             |                             | 4H2                   | 10                | 138,011,697           | 127,157,275           | 17,117,038                      | 15.43%                                   |
| Marshall et al. | IODP x347                  | 10H2                                  |                             | 30                    | 51,710,778        | 23,750,244            | 2,115,020             | 24.64%                          |                                          |
| RNA             | Zinke et al.               | IODP x347                             | M59                         | 5H2                   | 15                | 16,968,921            | 15,232,832            | 10,908,171                      | 28.36%                                   |
|                 | Zinke et al.               | IODP x347                             | M63                         | 6H2                   | 12                | 17,904,120            | 16,857,431            | 12,645,054                      | 24.02%                                   |
| <b>Max</b>      |                            |                                       |                             |                       |                   |                       |                       |                                 |                                          |
|                 | <b>Assembly Statistics</b> | <b>No. of contigs</b>                 | <b>No. of bp in contigs</b> | <b>Min bp contigs</b> | <b>bp contigs</b> | <b>Avg bp contigs</b> | <b>N50 bp contigs</b> |                                 |                                          |
|                 | Co-assembly                | 557,851                               | 1,072,605,570               | 1,000                 | 159,114           | 1,923                 | 1,921                 |                                 |                                          |

**Supplemental Table 2.** PFAM and TIGRFAM identifiers used in this study. Abbreviations are as follows: GH = Glycoside Hydrolase; CBM = Carbohydrate Binding Module; PL = Polysaccharide Lyase.

| <b>PFAM or TIGRFAM</b> | <b>Gene name</b>                    |
|------------------------|-------------------------------------|
| PF00232                | GH1                                 |
| TIGR03356              | GH1 (beta-galactosidase)            |
| PF00703                | GH2 (beta-sandwich)                 |
| PF02836                | GH2 (catalytic domain)              |
| PF00933                | GH3 (N-terminal)                    |
| PF01915                | GH3 (C-terminal)                    |
| PF02056                | GH4                                 |
| PF11975                | GH4 (C-terminal)                    |
| PF00150                | GH5                                 |
| PF14871                | GH6                                 |
| PF00840                | GH7                                 |
| PF01270                | GH8                                 |
| PF00759                | GH9                                 |
| PF00331                | GH10                                |
| PF02638                | GH10-like                           |
| PF00457                | GH11                                |
| PF01670                | GH12                                |
| PF00128                | GH13                                |
| PF02922                | GH13 (Isoamylase N-terminal domain) |
| PF14883                | GH13 (putative)                     |
| PF01373                | GH14                                |
| PF00723                | GH15                                |
| PF14885                | GH15 (putative)                     |
| PF00722                | GH16                                |
| PF00332                | GH17                                |
| PF00704                | GH18                                |
| PF00182                | GH19                                |
| PF00728                | GH20                                |
| PF00062                | GH22                                |
| PF01464                | GH23                                |
| PF00959                | GH24                                |
| PF01183                | GH25                                |
| PF02156                | GH26                                |

|         |                                 |
|---------|---------------------------------|
| PF16499 | GH27                            |
| PF00295 | GH28                            |
| PF01120 | GH29                            |
| PF02055 | GH30                            |
| PF01055 | GH31                            |
| PF00251 | GH32                            |
| PF02012 | GH33                            |
| PF00064 | GH64                            |
| PF00343 | GH35                            |
| PF01301 | GH35 (catalytic domain)         |
| PF02065 | GH36                            |
| PF01204 | GH37                            |
| PF09261 | GH38                            |
| PF01074 | GH38 (N-terminal domain)        |
| PF01229 | GH39                            |
| PF02449 | GH42                            |
| PF16126 | GH42 (putative)                 |
| PF04616 | GH43                            |
| PF02015 | GH45                            |
| PF01374 | GH46                            |
| PF01532 | GH47                            |
| PF02011 | GH48                            |
| PF03718 | GH49                            |
| PF03512 | GH52                            |
| PF07745 | GH53                            |
| PF09206 | GH54                            |
| PF01630 | GH56                            |
| PF03065 | GH57                            |
| PF02057 | GH61                            |
| PF03664 | GH62                            |
| PF03200 | GH63                            |
| PF03633 | GH65 (C-terminal domain)        |
| PF03632 | GH65 (central catalytic domain) |
| PF03636 | GH65 (N-terminal domain)        |
| PF14498 | GH65                            |
| PF07488 | GH67                            |
| PF02435 | GH68                            |
| PF02324 | GH70                            |
| PF03659 | GH71                            |

|           |                          |
|-----------|--------------------------|
| PF03198   | GH72                     |
| PF01832   | GH73                     |
| PF07335   | GH75                     |
| PF03663   | GH76                     |
| PF02446   | GH77                     |
| TIGR00217 | GH77 (malQ)              |
| PF05592   | GH78                     |
| PF03662   | GH79                     |
| PF03644   | GH85                     |
| PF07470   | GH88                     |
| PF05089   | GH89                     |
| PF07971   | GH92                     |
| PF10566   | GH97                     |
| PF08306   | GH98                     |
| PF16317   | GH99                     |
| PF03537   | GH114                    |
| PF12215   | GH116                    |
| PF04685   | GH116 (putative)         |
| PF11308   | GH129                    |
| PF13204   | Cellulase (putative)     |
| PF00734   | CBM 1 (fungal cellulose) |
| PF00553   | CBM 2                    |
| PF00942   | CBM 3 (Cellulose)        |
| PF02018   | CBM 4/9                  |
| PF02839   | CBM 5/12                 |
| PF03422   | CBM 6                    |
| PF02013   | CBM 10 (Cellulose)       |
| PF03425   | CBM 11                   |
| PF00662   | CBM 13                   |
| PF01607   | CBM 14                   |
| PF03426   | CBM 15                   |
| PF03424   | CBM 17/28                |
| PF00187   | CBM 18                   |
| PF03427   | CBM 19                   |
| PF00686   | CBM 20                   |
| PF03370   | CBM 21                   |
| PF03423   | CBM 25                   |
| PF09212   | CBM 27                   |
| PF00754   | CBM32/47                 |

|         |                                                              |
|---------|--------------------------------------------------------------|
| PF03067 | CBM 33                                                       |
| PF02903 | CBM 34                                                       |
| PF02973 | CBM 40                                                       |
| PF03714 | CBM 41                                                       |
| PF05270 | CBM 42                                                       |
| PF07983 | CBM 43                                                       |
| PF02922 | CBM 48                                                       |
| PF09478 | CBM 49                                                       |
| PF01476 | CBM 50                                                       |
| PF00544 | PL1                                                          |
| PF03211 | PL3                                                          |
| PF12708 | Pectate lyase superfamily                                    |
| PF06917 | Periplasmic pectate lyase                                    |
| PF14583 | Oligogalacturonate lyase                                     |
| PF14683 | PL4, Domain III                                              |
| PF14686 | PL4, Domain II                                               |
| PF09284 | PL4, Domain II                                               |
| PF05426 | PL5                                                          |
| PF02278 | PL8                                                          |
| PF05035 | 2-keto-3-deoxy-galactonokinase                               |
| PF09095 | Alpha-amylase/4-alpha-glucanotransferase (C-terminal domain) |
| PF09094 | Alpha-amylase/4-alpha-glucanotransferase (central domain)    |
| PF04041 | Beta-1,4-mannooligosaccharide phosphorylase                  |
| PF08329 | Chitinase A                                                  |
| PF06483 | Chitinase C                                                  |
| PF00596 | Class II Aldolase and Adducin (N-terminal domain)            |
| PF02782 | FGGY family of carbohydrate kinases (C-terminal domain)      |
| PF00370 | FGGY family of carbohydrate kinases (N-terminal domain)      |
| PF02585 | GlcNAc-PI (diacetylchitobiose) deacetylase                   |
| PF09985 | Glucodextranase (C-terminal binding module, SLH-like)        |
| PF02614 | Glucuronate isomerase                                        |
| PF03328 | HpcH/HpaI aldolase/citrate lyase family                      |
| PF01081 | KDPG and KHG aldolases                                       |
| PF02610 | L-arabinose isomerase                                        |
| PF11762 | L-arabinose isomerase (C-terminal domain)                    |

|         |                                                                                 |
|---------|---------------------------------------------------------------------------------|
| PF02952 | L-fucose isomerase (C-terminal domain)                                          |
| PF07882 | L-fucose isomerase (N-terminal domain II)                                       |
| PF07881 | L-fucose isomerase (N-terminal domain)                                          |
| PF16863 | maltase-glucoamylase (N term)                                                   |
| PF01095 | Pectinesterase                                                                  |
| PF00294 | pfkB family carbohydrate kinase                                                 |
| PF01522 | Polysaccharide deacetylase                                                      |
| PF11897 | Putative glycogen phosphorylase (DUF3417)                                       |
| PF05025 | RbsD / FucU transport protein                                                   |
| PF01380 | Sugar isomerases domain                                                         |
| PF04794 | YdjC-like carbohydrate deacetylase                                              |
| PF00144 | Alkaline D-peptidase                                                            |
| PF03576 | B-peptidyl aminopeptidase proprotein                                            |
| PF05343 | Broad-specificity exoaminopeptidase                                             |
| PF03415 | Clostripain                                                                     |
| PF01364 | Peptidase C25 (gingipain)                                                       |
| PF00246 | Peptidase M14                                                                   |
| PF01546 | Peptidase M20 (carboxypeptidase)                                                |
| PF04389 | Peptidase M28                                                                   |
| PF01432 | Peptidase M3                                                                    |
| PF02868 | Peptidase M4 (Neutral metallopeptidase; pseudolysin) thermolysin                |
| PF12904 | Peptidase M9                                                                    |
| PF01435 | Peptidase M48                                                                   |
| PF02163 | Peptidase M50                                                                   |
| PF00082 | Peptidase S8 (subtilase)                                                        |
| PF10502 | Peptidase S26 (signal peptidase)                                                |
| PF02129 | Peptidase S15 (Xaa-Pro dipeptidyl-peptidase )                                   |
| PF11667 | Peptidase Zincin                                                                |
| PF04298 | Zinc metallopeptidase II (putative)                                             |
| PF00871 | Aliphatic acid kinase short chain, including acetate kinase and butyrate kinase |
| PF02550 | Acetyl-CoA hydrolase transferase                                                |
| PF06314 | Acetoacetate decarboxylase                                                      |
| PF00465 | Alcohol dehydrogenase (Fe containing)                                           |
| PF00107 | Alcohol dehydrogenase (Zinc binding)                                            |
| PF08240 | Alcohol dehydrogenase                                                           |
| PF03306 | Acetolactate decarboxylase                                                      |
| PF09163 | Formate dehydrogenase                                                           |

|           |                                               |
|-----------|-----------------------------------------------|
| TIGR01583 | Formate dehydrogenase                         |
| TIGR01591 | Formate dehydrogenase                         |
| PF06050   | 2-hydroxyglutaryl-CoA dehydratase             |
| PF02733   | Dihydroxyacetone kinase                       |
| PF02734   | Dihydroxyacetone kinase                       |
| PF02288   | Diol/glycerol dehydratase                     |
| PF02286   | Diol/glycerol dehydratase                     |
| TIGR01771 | Lactate dehydrogenase                         |
| PF02901   | Pyruvate formate lyase                        |
| PF01558   | Pyruvate flavodoxin ferredoxin oxidoreductase |
| PF02775   | Pyruvate ferredoxin oxidoreductase            |
| PF00037   | Pyruvate ferredoxin oxidoreductase            |
| PF01855   | Pyruvate flavodoxin ferredoxin oxidoreductase |
| PF10371   | Pyruvate flavodoxin ferredoxin oxidoreductase |



**Supplemental Table 3.** PERMANOVA statistics calculated using abundances of ORFs classified by their annotation, i.e. Glycoside Hydrolases (GHs), Carbohydrate Binding Modules (CBMs), peptidases, and fermentation genes. Statistically significant groups with p-values less than 0.05 are bolded.

| Group of genes    | Env parameter                        | P-value      | R squared      | F statistic   |
|-------------------|--------------------------------------|--------------|----------------|---------------|
| <b>GHs</b>        | <b>Sediment age</b>                  | <b>0.043</b> | <b>0.245</b>   | <b>2.915</b>  |
| <b>GHs</b>        | <b>Glacial Marine vs. lacustrine</b> | <b>0.035</b> | <b>0.22682</b> | <b>2.6402</b> |
| <b>GHs</b>        | <b>Salinity</b>                      | <b>0.01</b>  | <b>0.34</b>    | <b>4.6</b>    |
| <b>GHs</b>        | <b>TC</b>                            | <b>0.005</b> | <b>0.34</b>    | <b>4.7</b>    |
| <b>GHs</b>        | <b>TOC</b>                           | <b>0.009</b> | <b>0.32</b>    | <b>4.2</b>    |
| GHs               | Formate                              | 0.177        | 0.164          | 1.771         |
| GHs               | Acetate                              | 0.352        | 0.366          | 1.03          |
| GHs               | Propionate                           | 0.217        | 0.14           | 1.412         |
| GHs               | Butyrate                             | 0.143        | 0.163          | 1.748         |
| CBMs              | Sediment age                         | 0.051        | 0.256          | 3.101         |
| CBMs              | Glacial Marine vs. lacustrine        | 0.092        | 0.20283        | 2.29          |
| <b>CBMs</b>       | <b>Salinity</b>                      | <b>0.008</b> | <b>0.3747</b>  | <b>5.3931</b> |
| <b>CBMs</b>       | <b>TC</b>                            | <b>0.036</b> | <b>0.284</b>   | <b>3.574</b>  |
| <b>CBMs</b>       | <b>TOC</b>                           | <b>0.003</b> | <b>0.46181</b> | <b>7.7228</b> |
| <b>CBMs</b>       | <b>Formate</b>                       | <b>0.005</b> | <b>0.42868</b> | <b>6.753</b>  |
| CBMs              | Formate                              | 0.072        | 0.261          | 3.175         |
| CBMs              | Acetate                              | 0.221        | 0.144          | 1.51          |
| CBMs              | Propionate                           | 0.263        | 0.85           | 0.086         |
| CBMs              | Butyrate                             | 0.535        | 0.078          | 0.76          |
| Peptidases        | Age                                  | 0.199        | 0.134          | 1.395         |
| Peptidases        | Glacial Marine vs. lacustrine        | 0.284        | 0.11596        | 1.1805        |
| <b>Peptidases</b> | <b>Salinity</b>                      | <b>0.032</b> | <b>0.3624</b>  | <b>5.1155</b> |
| <b>Peptidases</b> | <b>TC</b>                            | <b>0.038</b> | <b>0.29756</b> | <b>3.8125</b> |
| <b>Peptidases</b> | <b>TOC</b>                           | <b>0.002</b> | <b>0.42888</b> | <b>6.7584</b> |
| <b>Peptidases</b> | <b>Formate</b>                       | <b>0.023</b> | <b>0.32729</b> | <b>4.3787</b> |
| <b>Peptidases</b> | <b>Acetate</b>                       | <b>0.021</b> | <b>0.261</b>   | <b>1.181</b>  |
| Peptidases        | Acetate                              | 0.099        | 0.221          | 2.55          |
| Peptidases        | Propionate                           | 0.247        | 0.136          | 1.412         |
| Peptidases        | Butyrate                             | 0.263        | 0.14           | 1.416         |

|                     |                          |              |                |               |
|---------------------|--------------------------|--------------|----------------|---------------|
| <b>Fermentation</b> | <b>TOC</b>               | <b>0.021</b> | <b>0.36374</b> | <b>5.1452</b> |
| <b>Fermentation</b> | <b>TC</b>                | <b>0.002</b> | <b>0.53839</b> | <b>10.497</b> |
| Fermentation        | Glacial (yes or no)      | 0.284        | 0.116          | 1.213         |
| Fermentation        | Marine vs.<br>lacustrine | 0.088        | 0.2415         | 2.865         |
| Fermentation        | Salinity                 | 0.151        | 0.211          | 2.408         |
| Fermentation        | Approx Age               | 0.232        | 0.14           | 1.4653        |
| Fermentation        | Formate                  | 0.051        | 0.32           | 4.231         |
| Fermentation        | Acetate                  | 0.093        | 0.228          | 2.654         |
| Fermentation        | Propionate               | 0.514        | 0.072          | 0.694         |
| Fermentation        | Butyrate                 | 0.802        | 0.033          | 0.699         |
